# Supplementary material for: Xenopus CAF1 requires NOT1-mediated interaction with 4E-T to repress translation in vivo
Source: PubMed Central journal article supplement — RNA. 2015 Jul;21(7):1335–45. doi: 10.1261/rna.051565.115 (PMC4478352; doi:10.1261/rna.051565.115), 2015-07
Supplement: supp_051565.115_SuppFigs_Table.pdf [file supp_051565.115_SuppFigs_Table.pdf]

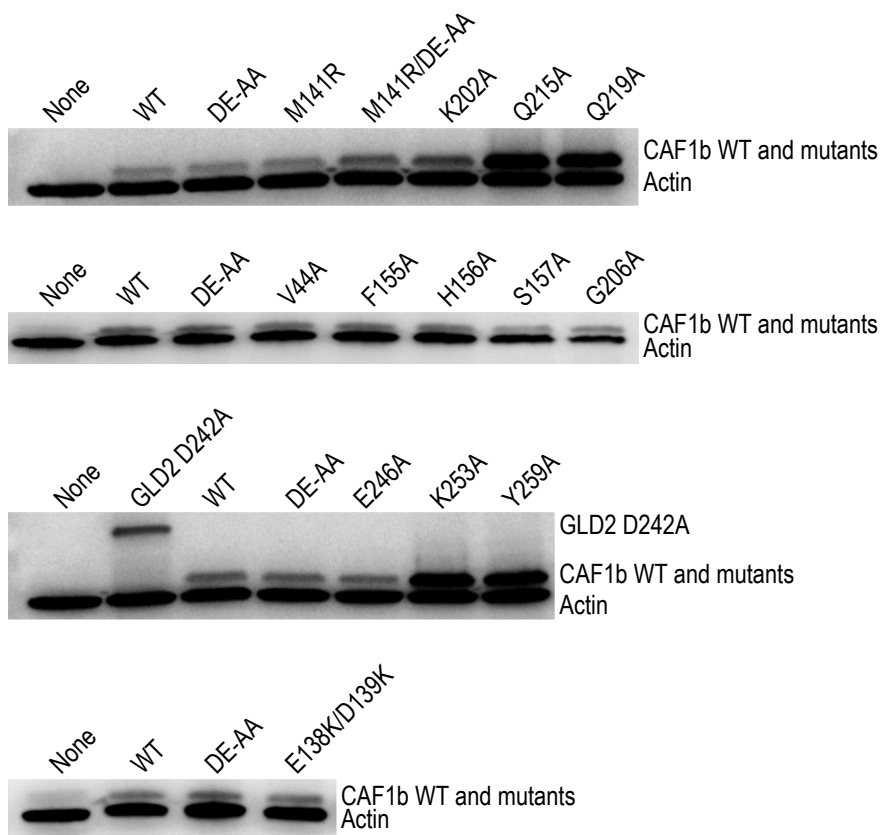

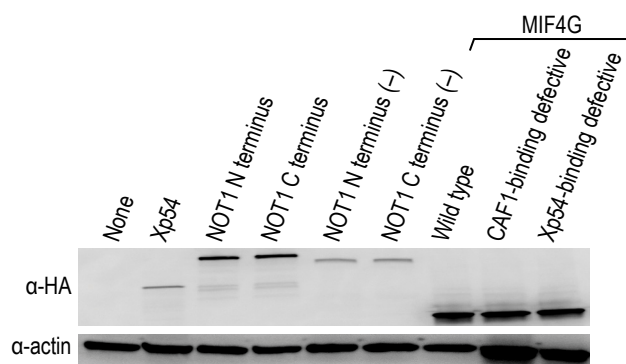

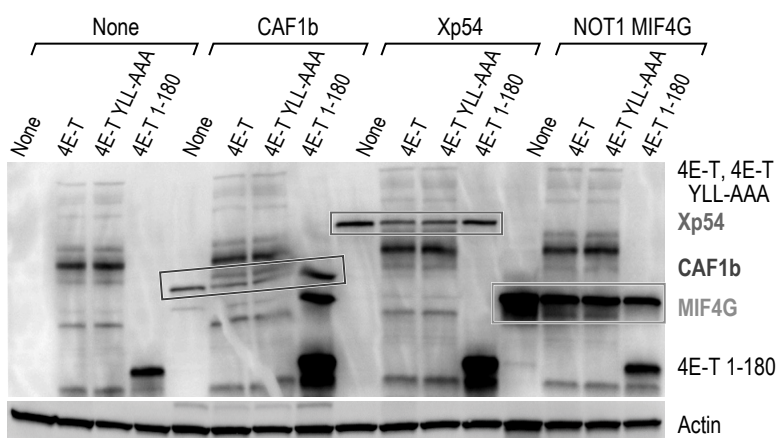

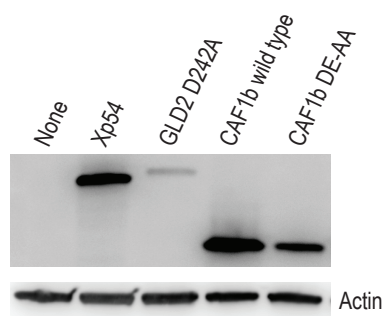

| <b>Specific to wild type CAF1a</b> | <b>Uniprot ID</b> |
|------------------------------------|-------------------|
| CNOT1                              | A0JP85            |
| CNOT2                              | F6PIP6            |
| CNOT3                              | B2GUB5            |
| CNOT10                             | F6QET6            |
| RQCD1                              | Q6P819            |
| DDX6                               | Q0IHV9            |
| EPABP                              | Q6DEY7            |
| CPEB1                              | F7B2S5            |

| <b>Specific to wild type CAF1b</b> | <b>Uniprot ID</b> |
|------------------------------------|-------------------|
| CNOT1                              | A0JP85            |
| CNOT2                              | F6PIP6            |
| CNOT3                              | B2GUB5            |
| CNOT10                             | F6QET6            |
| RQCD1                              | Q6P819            |
| DDX6                               | Q0IHV9            |
| EPABP                              | Q6DEY7            |
| CPEB1                              | F7B2S5            |
| LSM6                               | Q0VFB8            |
| PDIA3                              | F6UJP2            |
| SDHA                               | Q28ED0            |
